# Supplementary material for: Intact p53-Dependent Responses in miR-34–Deficient Mice
Source: PLOS journal article supplement (doi:10.1371/journal.pgen.1002797), 2012-07-26
Supplement: S7 (10.1371/journal.pgen.1002797.s007) [file journal.pgen.1002797.s007]

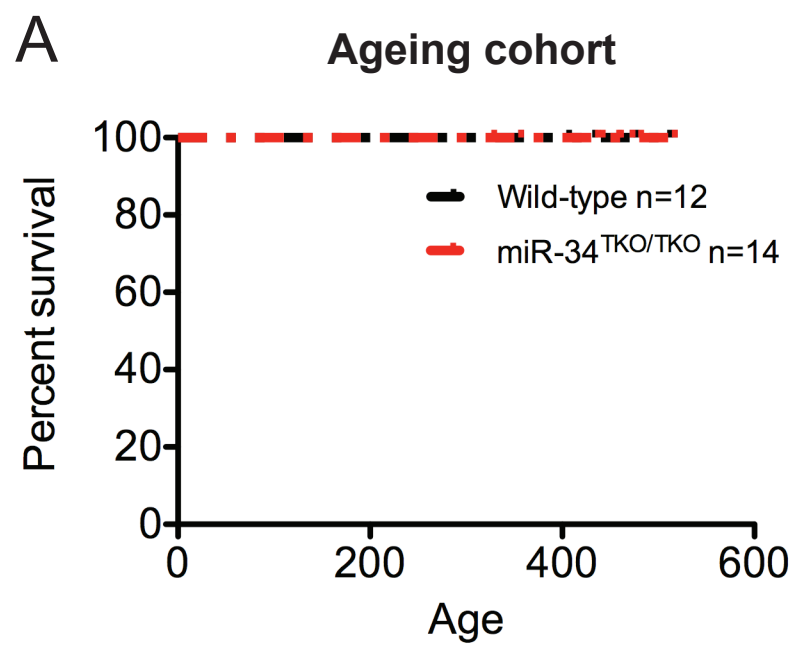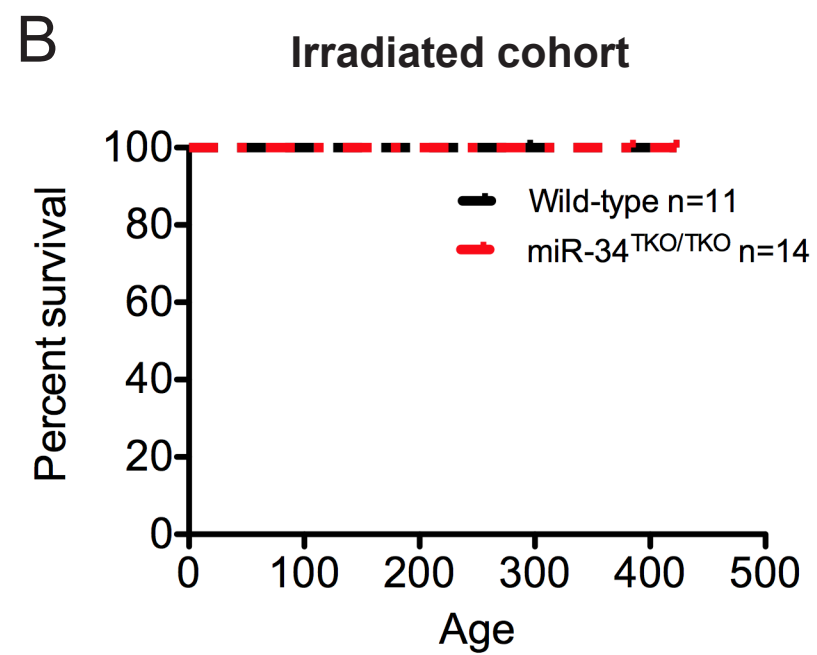

Supplementary Figure 7
